# Supplementary material for: A field-deployable water quality monitoring with machine learning-based smartphone colorimetry
Source: Royal Society of Chemistry journal article supplement (doi:10.1039/d2ay00785a), 2022-01-01
Supplement: d2ay00785a1.pdf [file d2ay00785a1.pdf]

## Electronic Supplementary Information

# A field-deployable water quality monitoring with machine learning based smartphone colorimetry

Vakkas Doğan<sup>a</sup>, Tuğba Isık<sup>b</sup>, Volkan Kılıç<sup>a,\*</sup> and Nesrin Horzum<sup>c,\*</sup>

<sup>a</sup>Department of Electrical and Electronics Engineering Graduate Program, Izmir Katip Celebi University, Izmir, Turkey.

<sup>b</sup>Department of Mineral Analysis and Technologies, General Directorate of Mineral Research and Exploration (MTA), Ankara, Turkey

<sup>c</sup>Department of Engineering Sciences, Izmir Katip Celebi University, Turkey.

**\*Corresponding author**

Email addresses: [volkan.kilic@ikcu.edu.tr](mailto:volkan.kilic@ikcu.edu.tr) (Volkan Kılıç),

## TABLES

**Table S1.** Classification accuracy results for all ions with different machine learning classifiers.

| Machine Learning Classifiers      | Classification Accuracy for Ions (%) |              |              |              |              |              |              |
|-----------------------------------|--------------------------------------|--------------|--------------|--------------|--------------|--------------|--------------|
|                                   | Ammonium                             | Arsenic      | Carbonate    | Chloride     | Iron         | Nitrate      | Sulfate      |
| Linear SVM                        | 85.95                                | 74.86        | 92.50        | 98.66        | 86.63        | 93.93        | 96.48        |
| Random Forest                     | 61.83                                | 61.81        | 81.81        | 98.38        | 64.76        | 82.30        | 81.57        |
| Decision Tree                     | 44.80                                | 43.82        | 60.97        | 61.57        | 47.74        | 63.21        | 54.35        |
| <b>Nearest Neighbors (KNN)</b>    | <b>98.69</b>                         | <b>95.63</b> | <b>98.10</b> | <b>99.95</b> | <b>97.88</b> | <b>98.45</b> | <b>99.72</b> |
| Bagging Classifier                | 45.48                                | 44.20        | 60.37        | 88.61        | 35.76        | 57.86        | 41.39        |
| Naive Bayes                       | 58.77                                | 59.03        | 80.93        | 84.58        | 55.73        | 73.85        | 63.47        |
| Gaussian Process                  | 65.04                                | 71.42        | 85.28        | 99.91        | 69.86        | 90.36        | 97.73        |
| Logistic Regression               | 76.43                                | 80.10        | 92.13        | 99.91        | 85.69        | 95.44        | 98.70        |
| Linear Discriminant Analysis      | 79.52                                | 81.11        | 92.22        | 99.91        | 88.37        | 95.60        | 98.47        |
| AdaBoost                          | 58.97                                | 54.76        | 64.54        | 19.03        | 63.19        | 70.67        | 22.08        |
| Bernoulli Naive Bayes             | 72.34                                | 75.38        | 89.68        | 85.42        | 78.61        | 92.50        | 80.83        |
| Extra Tree Classifier             | 57.46                                | 63.44        | 80.74        | 99.49        | 60.90        | 83.41        | 93.84        |
| Gradient Boosting Classifier      | 62.74                                | 66.72        | 76.90        | 95.00        | 61.93        | 75.47        | 70.79        |
| RBF SVM                           | 61.83                                | 65.44        | 76.94        | 96.01        | 57.31        | 74.47        | 72.08        |
| Nu SVM                            | 50.28                                | 56.65        | 69.49        | 89.71        | 41.30        | 63.84        | 59.21        |
| Passive Aggressive Classifier     | 59.64                                | 65.09        | 76.81        | 95.41        | 54.21        | 72.36        | 70.60        |
| QDA                               | 54.40                                | 61.69        | 72.87        | 90.96        | 48.92        | 68.34        | 60.46        |
| Weighted KNN                      | 64.56                                | 68.74        | 79.44        | 96.57        | 63.43        | 77.70        | 75.09        |
| Ensemble Boosted Tree             | 72.98                                | 68.82        | 89.81        | 99.35        | 74.79        | 89.09        | 95.97        |
| Ensemble Bagged Tree              | 93.93                                | 86.91        | 95.74        | 99.49        | 95.03        | 97.50        | 99.07        |
| Ensemble Subspace<br>Discriminant | 57.02                                | 63.78        | 80.37        | 99.44        | 64.62        | 78.73        | 97.45        |
| Coarse Tree                       | 94.69                                | 92.63        | 97.10        | 93.20        | 96.88        | 94.48        | 97.95        |
| Ensemble RUS Boosted Tree         | 62.02                                | 61.11        | 82.45        | 97.27        | 65.00        | 82.30        | 81.76        |

**Table S2.** Evaluation of the KNN for Ammonium in terms of precision, recall and F1-score.

| <b>Concentrations (mg/L)</b> | <b>Precision</b> | <b>Recall</b> | <b>F1-score</b> |
|------------------------------|------------------|---------------|-----------------|
| <b>0</b>                     | 0.994            | 0.989         | 0.992           |
| <b>10</b>                    | 0.969            | 0.986         | 0.978           |
| <b>30</b>                    | 0.975            | 0.975         | 0.975           |
| <b>60</b>                    | 0.978            | 0.967         | 0.972           |
| <b>100</b>                   | 0.978            | 0.981         | 0.979           |
| <b>200</b>                   | 1.000            | 0.997         | 0.999           |
| <b>400</b>                   | 1.000            | 1.000         | 1.000           |
| <b>Average</b>               | <b>0.985</b>     | <b>0.985</b>  | <b>0.985</b>    |

**Table S3.** Evaluation of the KNN for Arsenic in terms of precision, recall and F1-score.

| <b>Concentrations (mg/L)</b> | <b>Precision</b> | <b>Recall</b> | <b>F1-score</b> |
|------------------------------|------------------|---------------|-----------------|
| <b>0</b>                     | 0.944            | 0.958         | 0.951           |
| <b>0.005</b>                 | 0.956            | 0.930         | 0.942           |
| <b>0.01</b>                  | 0.969            | 0.991         | 0.980           |
| <b>0.025</b>                 | 0.986            | 0.975         | 0.981           |
| <b>0.05</b>                  | 0.858            | 0.904         | 0.880           |
| <b>0.1</b>                   | 0.908            | 0.867         | 0.887           |
| <b>0.25</b>                  | 0.992            | 0.997         | 0.994           |
| <b>0.5</b>                   | 0.997            | 0.992         | 0.994           |
| <b>Average</b>               | <b>0.951</b>     | <b>0.952</b>  | <b>0.951</b>    |

**Table S4.** Evaluation of the KNN for Carbonate in terms of precision, recall and F1-score.

| <b>Concentrations (mg/L)</b> | <b>Precision</b> | <b>Recall</b> | <b>F1-score</b> |
|------------------------------|------------------|---------------|-----------------|
| <b>0</b>                     | 1.000            | 0.997         | 0.999           |
| <b>70</b>                    | 0.997            | 1.000         | 0.999           |
| <b>140</b>                   | 1.000            | 1.000         | 1.000           |
| <b>215</b>                   | 1.000            | 0.997         | 0.999           |
| <b>285</b>                   | 0.939            | 0.934         | 0.936           |
| <b>430</b>                   | 0.933            | 0.941         | 0.937           |
| <b>Average</b>               | <b>0.978</b>     | <b>0.978</b>  | <b>0.978</b>    |

**Table S5.** Evaluation of the KNN for Iron in terms of precision, recall and F1-score.

| <b>Concentrations (mg/L)</b> | <b>Precision</b> | <b>Recall</b> | <b>F1-score</b> |
|------------------------------|------------------|---------------|-----------------|
| <b>0</b>                     | 0.956            | 0.932         | 0.944           |
| <b>3</b>                     | 0.942            | 0.947         | 0.944           |
| <b>10</b>                    | 0.944            | 0.950         | 0.947           |
| <b>25</b>                    | 0.972            | 0.989         | 0.980           |
| <b>50</b>                    | 0.989            | 0.989         | 0.989           |
| <b>100</b>                   | 0.994            | 0.992         | 0.993           |
| <b>250</b>                   | 0.997            | 1.000         | 0.999           |
| <b>500</b>                   | 1.000            | 0.997         | 0.999           |
| <b>Average</b>               | <b>0.974</b>     | <b>0.974</b>  | <b>0.974</b>    |

**Table S6.** Evaluation of the KNN for Nitrate in terms of precision, recall and F1-score.

| <b>Concentrations (mg/L)</b> | <b>Precision</b> | <b>Recall</b> | <b>F1-score</b> |
|------------------------------|------------------|---------------|-----------------|
| <b>0</b>                     | 0.975            | 0.936         | 0.955           |
| <b>10</b>                    | 0.942            | 0.971         | 0.956           |
| <b>30</b>                    | 0.975            | 0.986         | 0.980           |
| <b>60</b>                    | 0.997            | 0.989         | 0.993           |
| <b>100</b>                   | 0.989            | 0.997         | 0.993           |
| <b>200</b>                   | 0.992            | 0.997         | 0.994           |
| <b>400</b>                   | 0.997            | 0.992         | 0.994           |
| <b>Average</b>               | <b>0.981</b>     | <b>0.981</b>  | <b>0.981</b>    |

**Table S7.** Results of observers in different types of illumination relative to test strips.

|                | Ammonium<br>(mg/L) | Carbonate<br>(mg/L) | Chloride<br>(mg/L) | Nitrate<br>(mg/L) | Illumination types                 |
|----------------|--------------------|---------------------|--------------------|-------------------|------------------------------------|
| <b>Balçova</b> |                    |                     |                    |                   |                                    |
| Observer 1     | 10                 | 285                 | 0                  | 10                | Halogen (H)                        |
|                | 10                 | 285                 | 0                  | 10                | Fluorescent (F)                    |
|                | 10                 | 285                 | 0                  | 10                | Sunlight (S)                       |
|                | 10                 | 285                 | 0                  | 10                | Halogen-Fluorescent (HF)           |
|                | 10                 | 285                 | 0                  | 10                | Halogen-Sunlight (HS)              |
|                | 10                 | 285                 | 0                  | 10                | Fluorescent-Sunlight (FS)          |
|                | 10                 | 285                 | 0                  | 10                | Halogen-Fluorescent-Sunlight (HFS) |
|                | 10                 | 285                 | 0                  | 10                | Daylight (D)                       |
|                |                    |                     |                    |                   |                                    |
| Observer 2     | 10                 | 285                 | 0                  | 10                | H                                  |
|                | 0                  | 215                 | 0                  | 10                | F                                  |
|                | 0                  | 215                 | 0                  | 10                | S                                  |
|                | 10                 | 215                 | 0                  | 10                | HF                                 |
|                | 0                  | 215                 | 0                  | 10                | HS                                 |
|                | 10                 | 215                 | 0                  | 10                | FS                                 |
|                | 0                  | 215                 | 0                  | 10                | HFS                                |
|                | 10                 | 215                 | 0                  | 10                | D                                  |
|                |                    |                     |                    |                   |                                    |
| Observer 3     | 10                 | 285                 | 0                  | 10                | H                                  |
|                | 10                 | 285                 | 0                  | 10                | F                                  |
|                | 10                 | 285                 | 0                  | 10                | S                                  |
|                | 10                 | 285                 | 0                  | 10                | HF                                 |
|                | 10                 | 285                 | 0                  | 10                | HS                                 |
|                | 10                 | 285                 | 0                  | 10                | FS                                 |
|                | 10                 | 285                 | 0                  | 10                | HFS                                |
|                | 10                 | 215                 | 0                  | 10                | D                                  |
| <b>Buca</b>    |                    |                     |                    |                   |                                    |
| Observer 1     | 0                  | 215                 | 0                  | 0                 | H                                  |
|                | 0                  | 215                 | 0                  | 0                 | F                                  |
|                | 0                  | 215                 | 0                  | 0                 | S                                  |
|                | 0                  | 215                 | 0                  | 0                 | HF                                 |
|                | 0                  | 215                 | 0                  | 0                 | HS                                 |
|                | 0                  | 215                 | 0                  | 0                 | FS                                 |
|                | 0                  | 215                 | 0                  | 0                 | HFS                                |
|                | 0                  | 215                 | 0                  | 0                 | D                                  |
|                |                    |                     |                    |                   |                                    |
| Observer 2     | 0                  | 215                 | 0                  | 0                 | H                                  |
|                | 0                  | 215                 | 0                  | 0                 | F                                  |

|                  |    |     |     |    |     |
|------------------|----|-----|-----|----|-----|
|                  | 0  | 215 | 0   | 0  | S   |
|                  | 0  | 215 | 0   | 0  | HF  |
|                  | 0  | 215 | 0   | 0  | HS  |
|                  | 0  | 215 | 0   | 0  | FS  |
|                  | 0  | 215 | 0   | 0  | HFS |
|                  | 0  | 215 | 0   | 0  | D   |
|                  |    |     |     |    |     |
| Observer 3       | 0  | 215 | 0   | 0  | H   |
|                  | 0  | 215 | 0   | 0  | F   |
|                  | 0  | 215 | 0   | 0  | S   |
|                  | 0  | 215 | 0   | 0  | HF  |
|                  | 0  | 215 | 0   | 0  | HS  |
|                  | 0  | 215 | 0   | 0  | FS  |
|                  | 0  | 215 | 0   | 0  | HFS |
|                  | 0  | 215 | 0   | 0  | D   |
| <b>Kemalpaşa</b> |    |     |     |    |     |
| Observer 1       | 10 | 285 | 500 | 30 | H   |
|                  | 10 | 285 | 500 | 30 | F   |
|                  | 10 | 285 | 500 | 30 | S   |
|                  | 10 | 285 | 500 | 30 | HF  |
|                  | 10 | 285 | 500 | 30 | HS  |
|                  | 10 | 285 | 500 | 30 | FS  |
|                  | 10 | 285 | 500 | 30 | HFS |
|                  | 10 | 285 | 500 | 30 | D   |
|                  |    |     |     |    |     |
| Observer 2       | 10 | 285 | 0   | 30 | H   |
|                  | 10 | 285 | 0   | 30 | F   |
|                  | 10 | 285 | 0   | 30 | S   |
|                  | 10 | 285 | 0   | 30 | HF  |
|                  | 10 | 285 | 0   | 30 | HS  |
|                  | 10 | 285 | 0   | 30 | FS  |
|                  | 10 | 285 | 0   | 30 | HFS |
|                  | 10 | 285 | 0   | 30 | D   |
|                  |    |     |     |    |     |
| Observer 3       | 10 | 285 | 0   | 30 | H   |
|                  | 10 | 285 | 0   | 30 | F   |
|                  | 10 | 285 | 0   | 30 | S   |
|                  | 10 | 285 | 0   | 30 | HF  |
|                  | 10 | 285 | 0   | 30 | HS  |
|                  | 10 | 285 | 0   | 30 | FS  |
|                  | 10 | 285 | 0   | 30 | HFS |
|                  | 10 | 285 | 0   | 30 | D   |

**Table S8.** Reference values analysed by IC

|           | Ammonium (mg/L) | Carbonate (mg/L) | Chloride (mg/L) | Nitrate (mg/L) |
|-----------|-----------------|------------------|-----------------|----------------|
| Balcova   | ND              | 183.39           | 23,352          | 2,510          |
| Buca      | 0.0390          | 125.97           | 34,529          | 0.956          |
| Kemalpasa | ND              | 201.01           | 192,244         | 24,193         |

**Table S9.** Raw data from visual observations

|           | Ammonium |                      | Carbonate |                      | Chloride |                      | Nitrate  |                      |
|-----------|----------|----------------------|-----------|----------------------|----------|----------------------|----------|----------------------|
|           | Quantity | Concentration (mg/L) | Quantity  | Concentration (mg/L) | Quantity | Concentration (mg/L) | Quantity | Concentration (mg/L) |
| Balcova   | 2        | 10                   | 5         | 285                  | 1        | 0                    | 2        | 10                   |
| Buca      | 1        | 0                    | 4         | 215                  | 1        | 0                    | 1        | 0                    |
| Kemalpasa | 2        | 10                   | 5         | 285                  | 1        | 0                    | 3        | 30                   |

**Table S10:** Water samples were taken from different districts Balcova, Buca and Kemalpasa of Izmir with different illumination types, respectively. The order of ions from left to right is ammonium, arsenic, carbonate, chloride, iron, nitrate and sulfate.

| Illumination Types | Balcova                                                                             | Buca                                                                                 | Kemalpasa                                                                             |
|--------------------|-------------------------------------------------------------------------------------|--------------------------------------------------------------------------------------|---------------------------------------------------------------------------------------|
| Halogen (H)        | 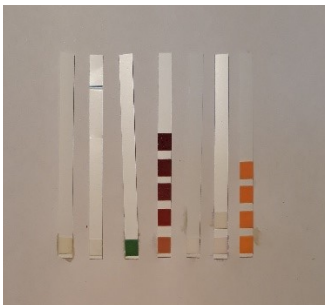 |  |  |
| Fluorescent (F)    |  |  |  |

|                                                  |                                                                                     |                                                                                      |                                                                                       |
|--------------------------------------------------|-------------------------------------------------------------------------------------|--------------------------------------------------------------------------------------|---------------------------------------------------------------------------------------|
| <p><b>Sunlight (S)</b></p>                       | 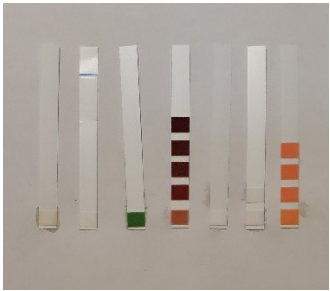   |    |    |
| <p><b>Halogen-Fluorescent (HF)</b></p>           |    |    |    |
| <p><b>Halogen-Sunlight (HS)</b></p>              |   |   |   |
| <p><b>Fluorescent-Sunlight (FS)</b></p>          |  |  |  |
| <p><b>Halogen-Fluorescent-Sunlight (HFS)</b></p> |  |  |  |



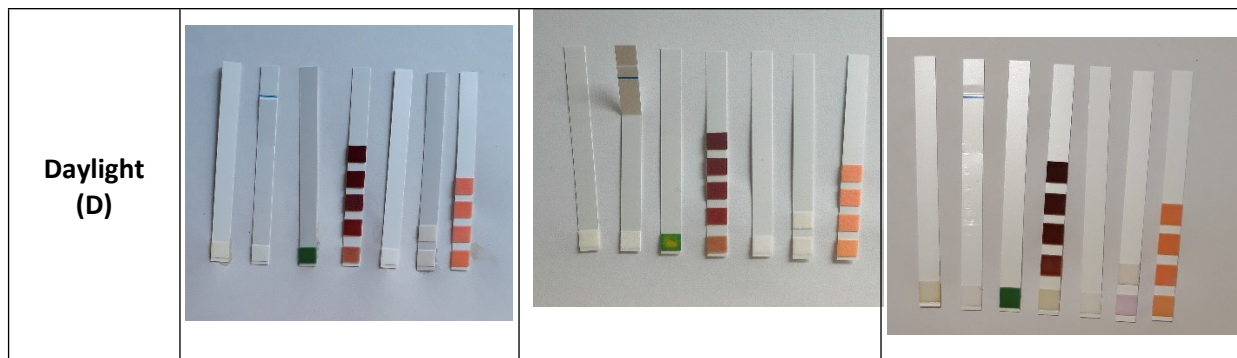

**FIGURES**

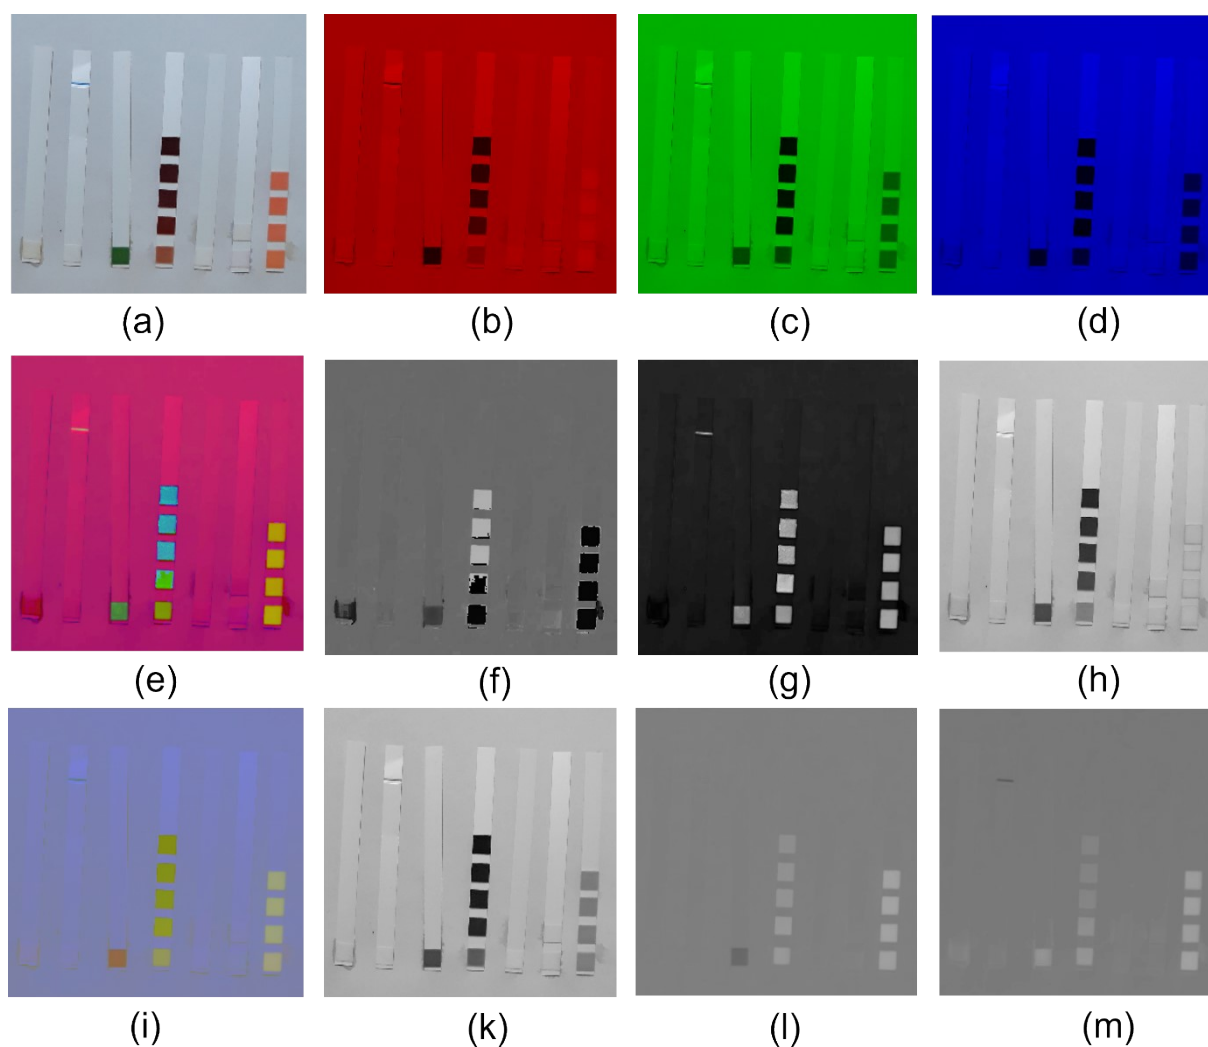

**Fig. S1:** The original image with RGB in (a), red channel in (b), green channel in (c), blue channel in (d), converted image of RGB to HSV in (e), hue channel in (f), saturation channel in (g), value channel in (h), converted image of RGB to LAB in (i), lightness channel in (k), green-red channel in (l), and blue-yellow channel in (m) are shown.

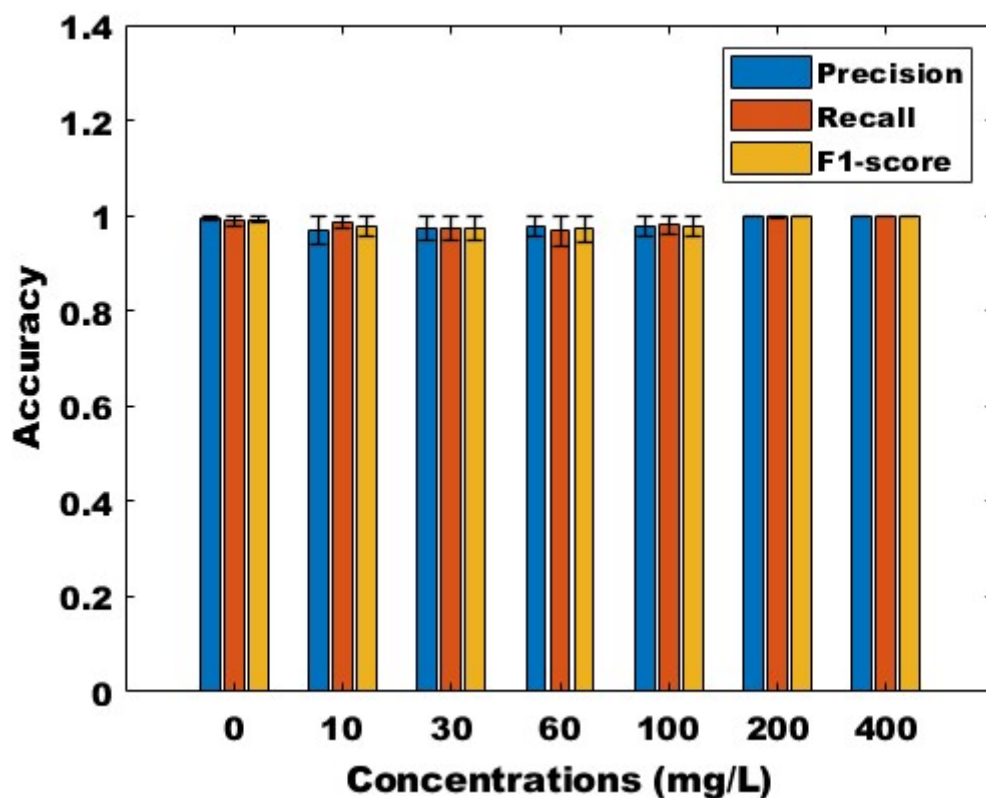

Fig. S2: Evaluation of KNN with error bars in terms of precision, recall, and F1-score for Ammonium.

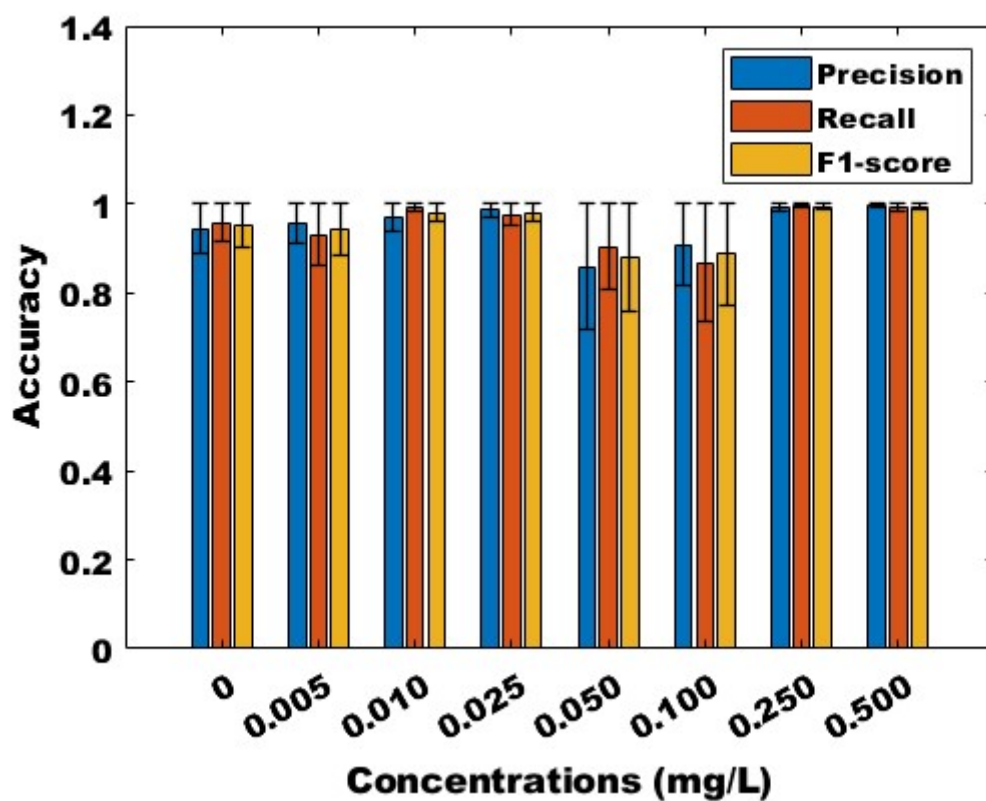

Fig. S3 Evaluation of KNN with error bars in terms of precision, recall, and F1-score for Arsenic.

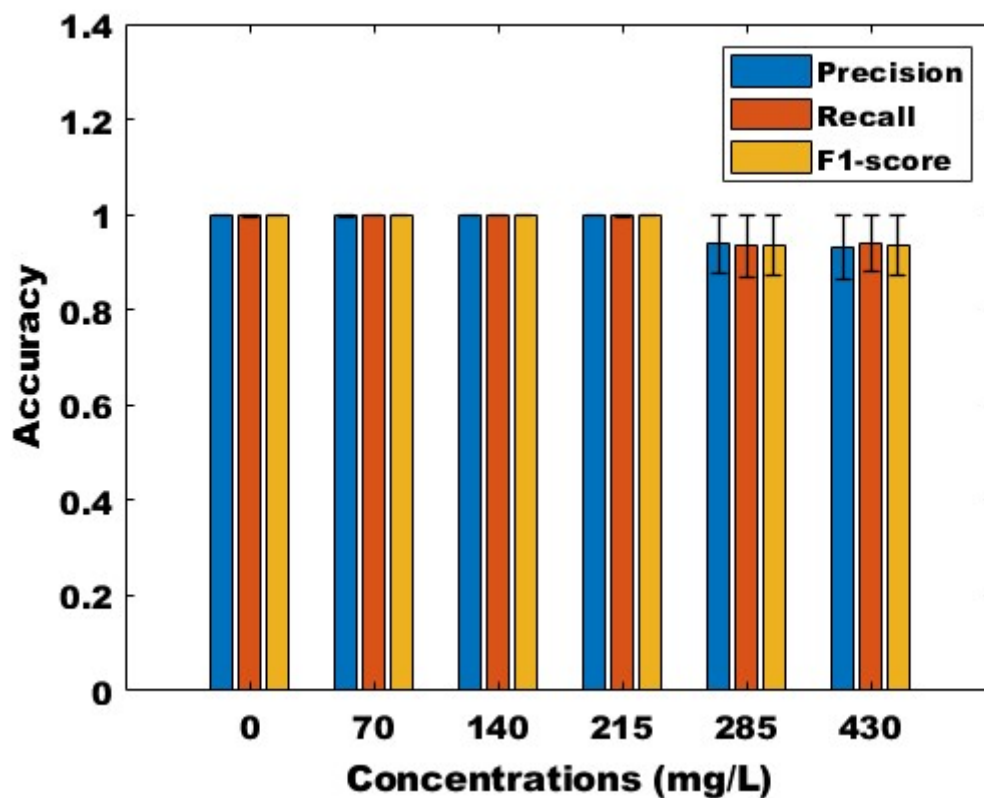

Fig. S4: Evaluation of KNN with error bars in terms of precision, recall, and F1-score for Carbonate.

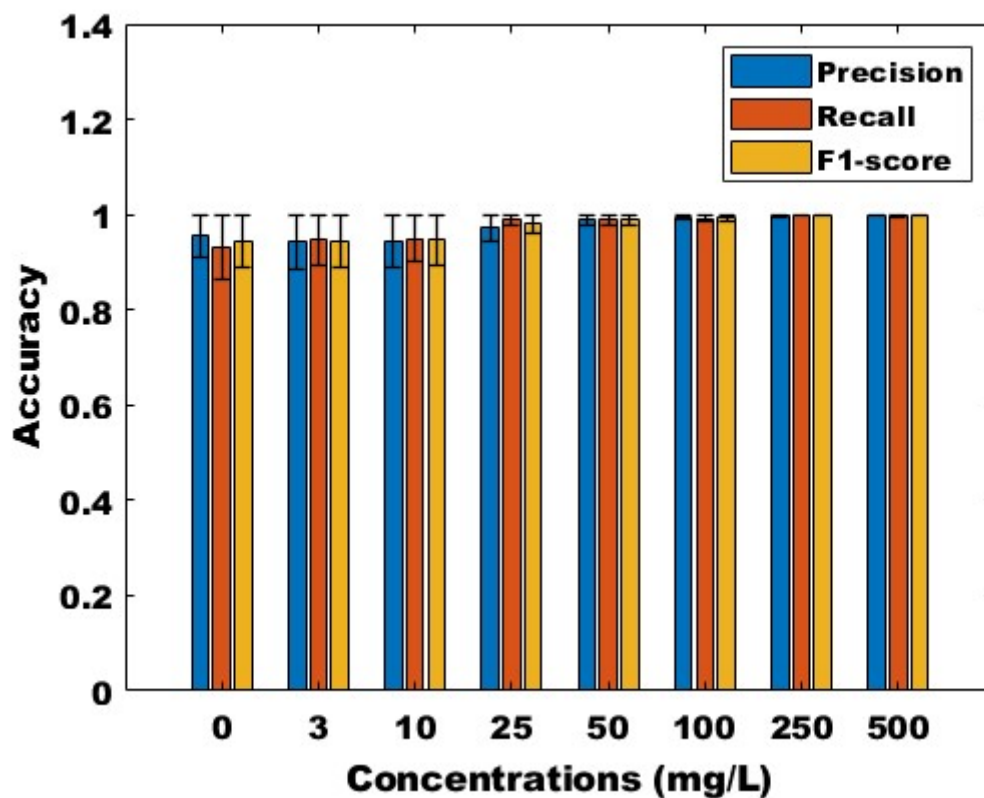

**Fig. S5:** Evaluation of KNN with error bars in terms of precision, recall, and F1-score for Iron.

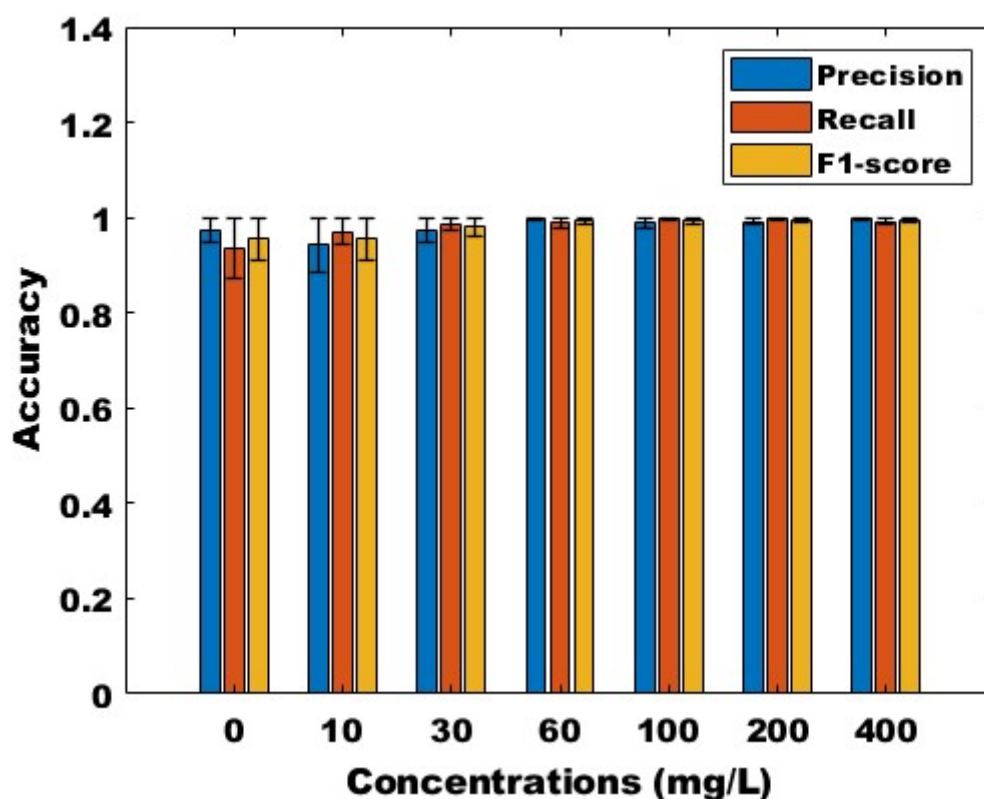

**Fig. S6:** Evaluation of KNN with error bars in terms of precision, recall, and F1-score for Nitrate.

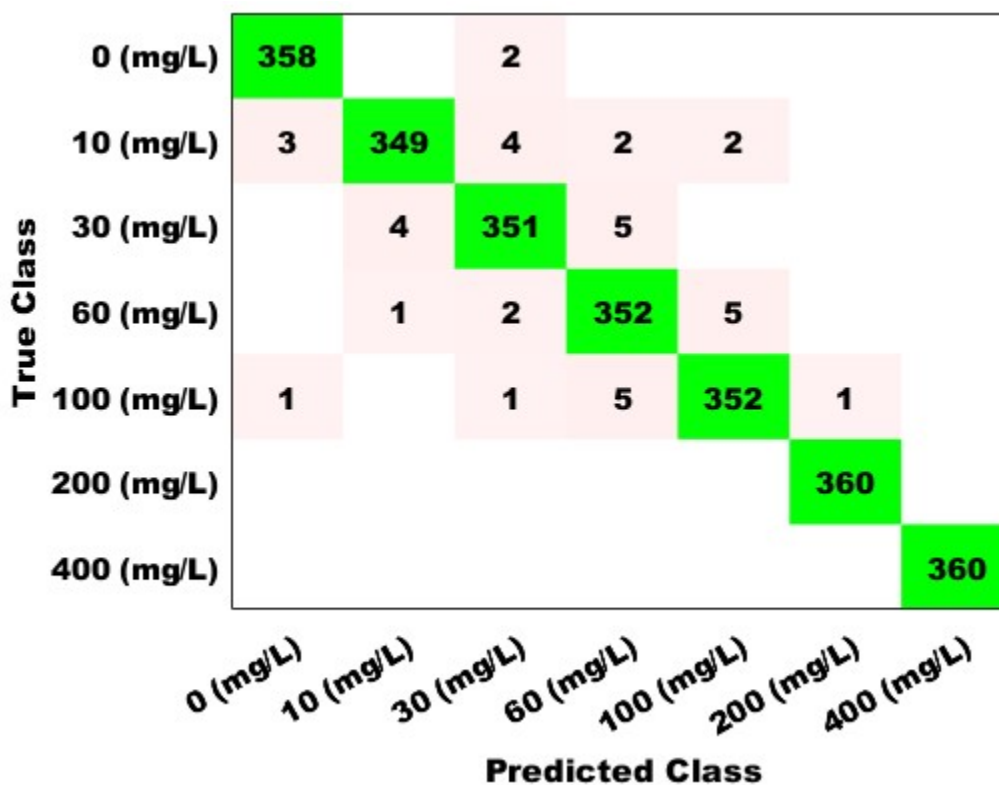

**Fig. S7:** Confusion matrix of Ammonium for the KNN classifier including 0-400 mg/L concentrations.

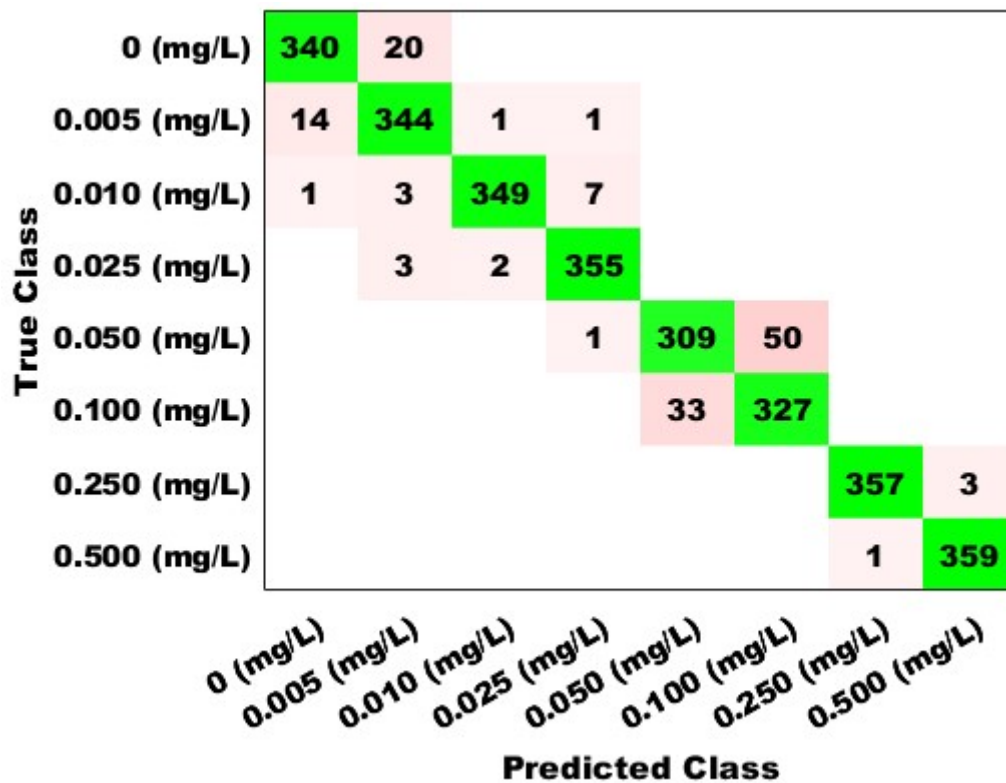

**Fig. S8:** Confusion matrix of Arsenic for the KNN classifier including 0-0.500 mg/L concentrations.

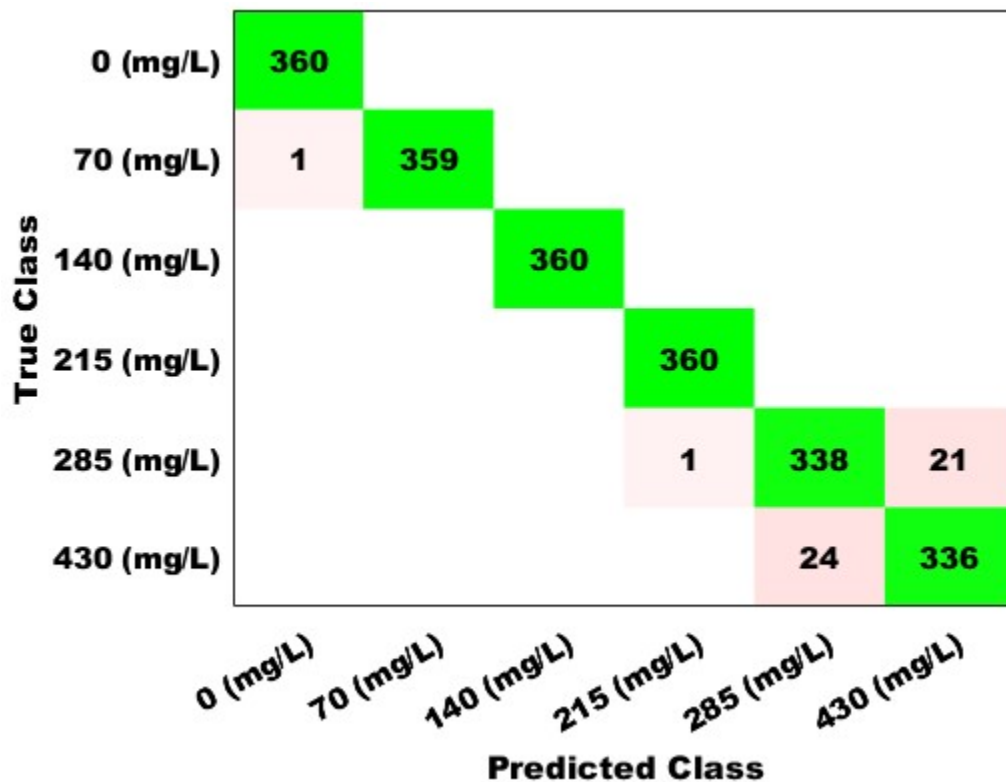

**Fig. S9:** Confusion matrix of Carbonate for the KNN classifier including 0-430 mg/L concentrations.

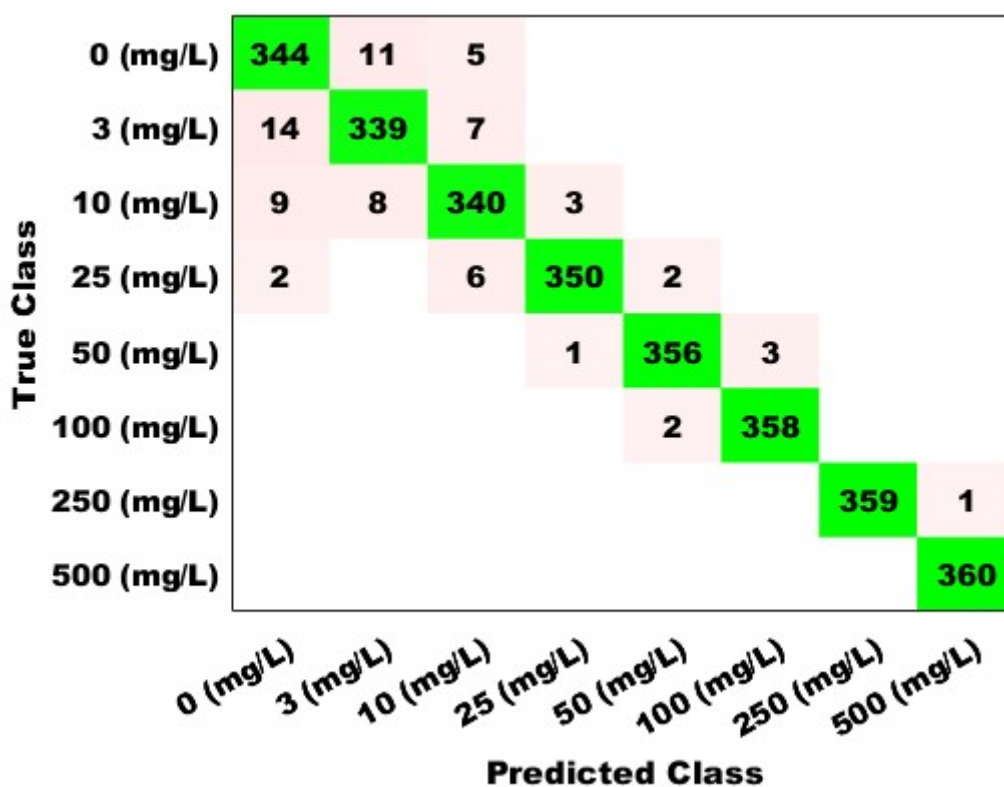

Fig. S10: Confusion matrix of Iron for the KNN classifier including 0-500 mg/L concentrations.

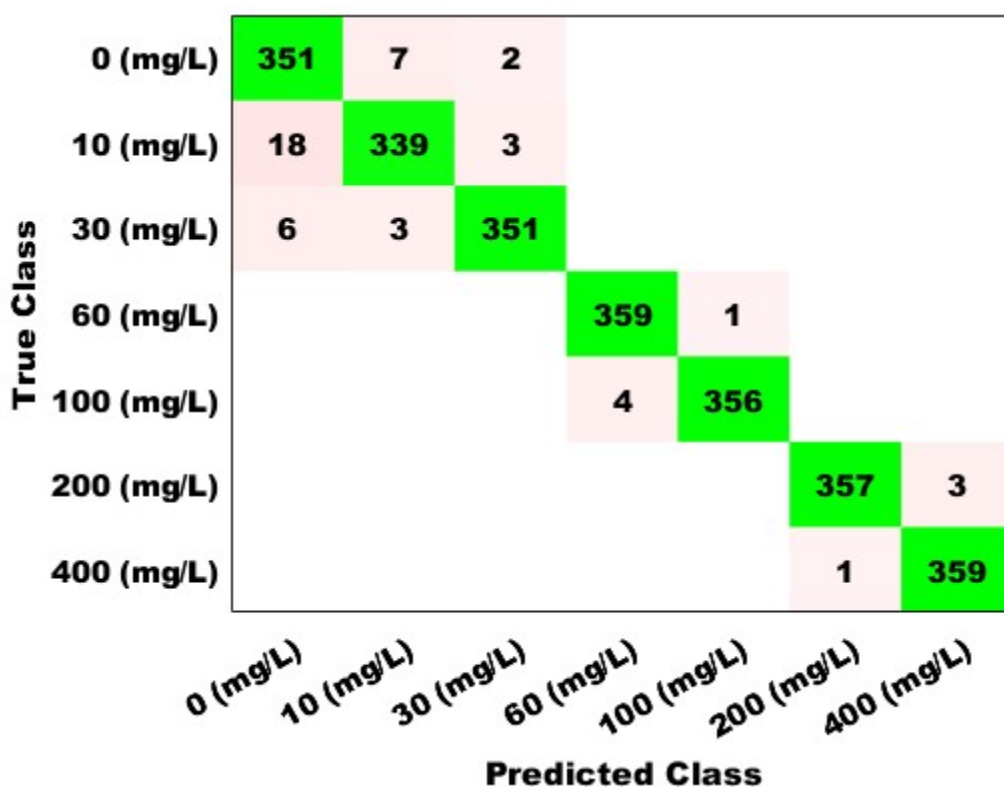

Fig. S11: Confusion matrix of Nitrate for the KNN classifier including 0-400 mg/L concentrations.



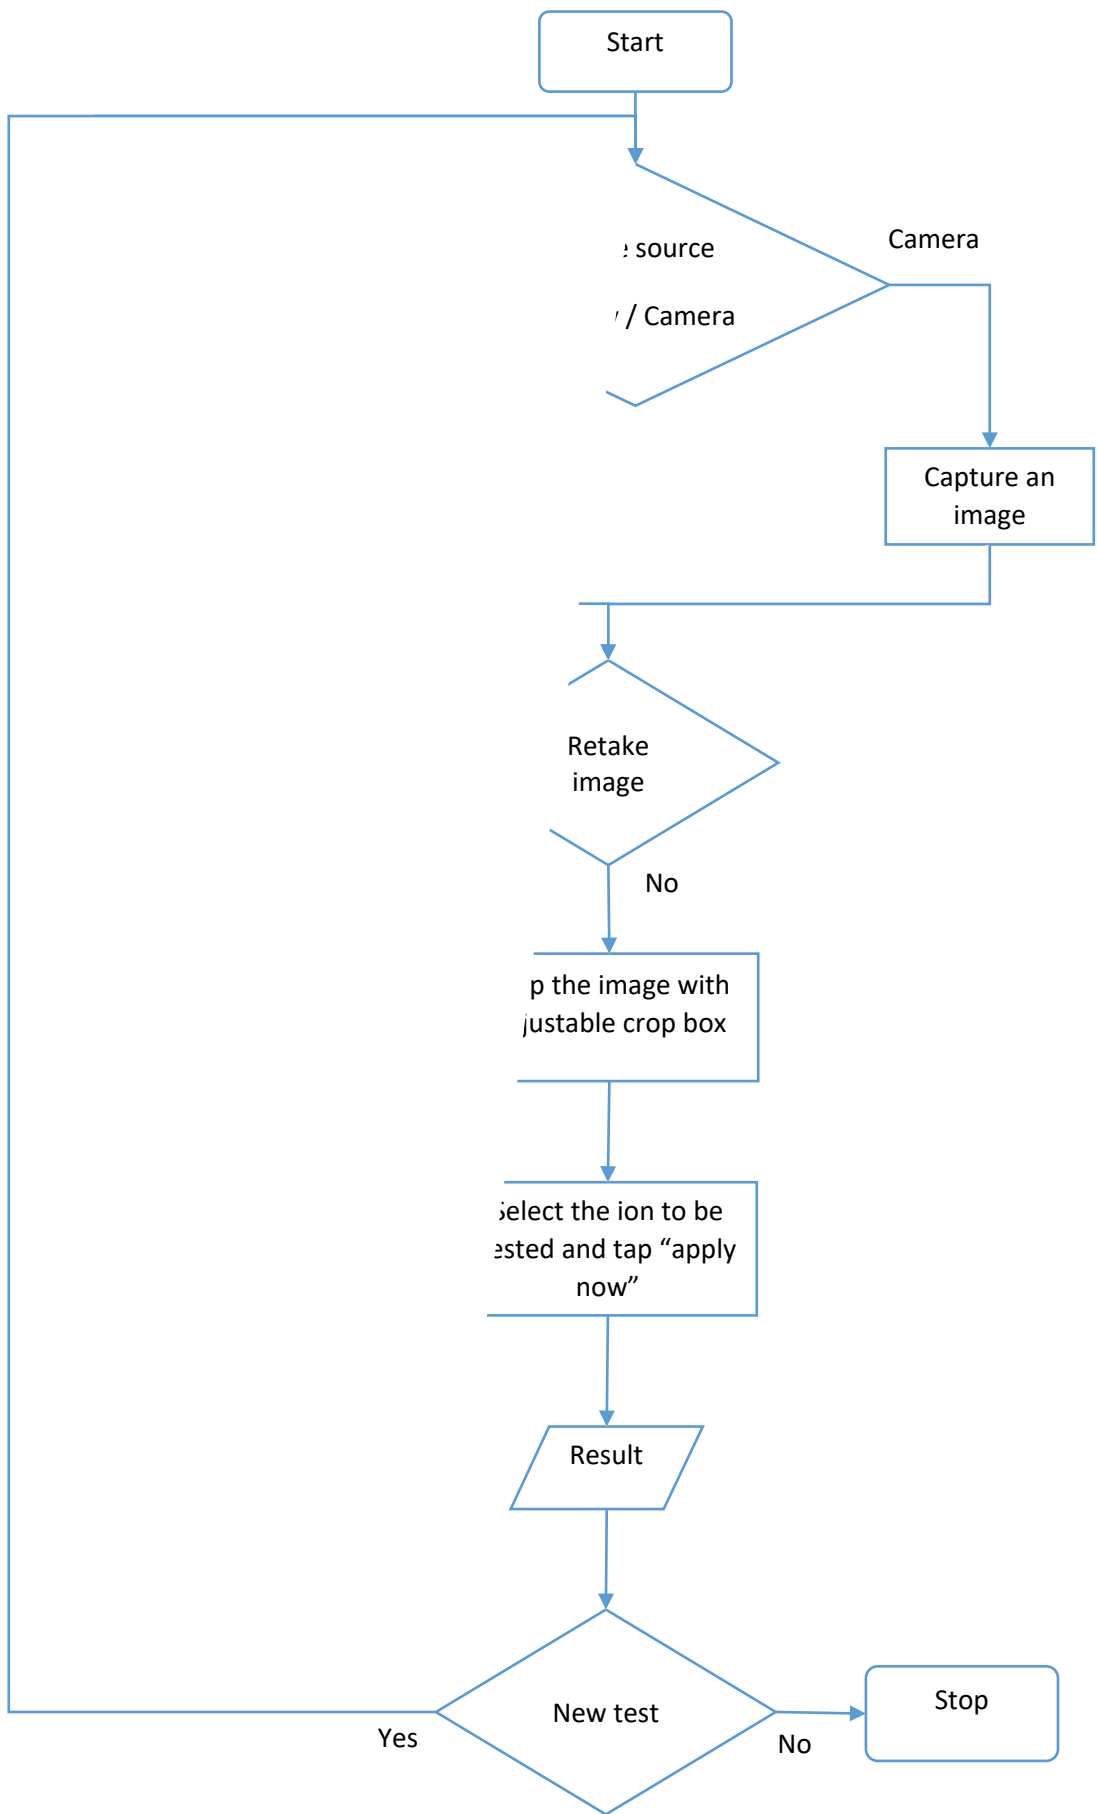

**Fig. S12:** Flow chart of the proposed water monitoring



## S1. Feature extraction

Basic definitions and equations of the features are explained in this section.

### 1. Mean

The mean,  $\mu$ , the first color moment, gives the average color value of the image (Equation (1)).

$$\mu = \frac{1}{pq} \sum_{i=1}^p \sum_{j=1}^q pixel_{ij} \quad (1)$$

Here,  $p$  and  $q$  are the values of the pixel in the  $i^{\text{th}}$  row  $j^{\text{th}}$  column at image  $pixel_{ij}$ .

### 2. Skewness

Skewness is a measure of asymmetry in distribution. The dataset is symmetrical if the left and right sides of the center point are the same. If the skewness is positive (skewed to the right), the data is spread to the left of the mean. If the skewness is negative (skewed to the left), the data will apply to the right of the mean. To extract information from the image, darker and brighter surfaces tend to have positive skewness compared to lighter and matte surfaces. Skewness gives information about the color distribution which is defined in Equation (2),

$$S = \sqrt[3]{\frac{1}{pq} \sum_{i=1}^p \sum_{j=1}^q (pixel_{ij} - \mu)^3} \quad (2)$$

### 3. Kurtosis

Kurtosis is the normalized form of the fourth central moment of distribution. It is also defined as the measure of the sharpness of the peak of a distribution. A high kurtosis distribution usually has a sharper rise, while a low kurtosis distribution usually has a more rounded elevation. Kurtosis is defined in Equation (3),

$$K = \sqrt[4]{\frac{1}{pq} \sum_{i=1}^p \sum_{j=1}^q (pixel_{ij} - \mu)^4} \quad (3)$$

### 4. Contrast

Contrast is a measure of the intensity or gray level variations between a reference pixel and its neighbour. Large contrast indicates large density differences. A still image has a contrast value of 0. The contrast is defined in Equation (4),

$$Contrast = \sum_i \sum_j (i - j)^2 r(i, j) \quad (4)$$

Here,  $r(i, j)$  is the gray level value of the pixel in the  $(i, j)$  coordinate.

## 5. Correlation

Correlation is the measure of linear dependence of gray level values which returns a measure between a pixel and its neighbours. The correlation was calculated in Equation (7) with means  $\mu_i, \mu_j$  (Equation (5)), standard deviations  $\sigma_i, \sigma_j$  (Equation (6)),

$$\mu_i = \sum_i \sum_j ir(i,j) \quad , \quad \mu_j = \sum_i \sum_j jr(i,j) \quad (5)$$

$$\sigma_i^2 = \sum_i \sum_j (i - \mu_i)^2 r(i,j) \quad , \quad \sigma_j^2 = \sum_i \sum_j (j - \mu_j)^2 r(i,j) \quad (6)$$

$$Correlation = \sum_i \sum_j \frac{(i - \mu_i)(j - \mu_j)r(i,j)}{\sigma_i \sigma_j} \quad (7)$$

## 6. Homogeneity

Homogeneity is a measure of how close the distribution of elements in the gray-level co-occurrence matrix to the diagonal of the matrix. As homogeneity increases, contrast decreases. Homogeneity is defined in Equation (8),

$$Homogeneity = \sum_i \sum_j \frac{r(i,j)}{1 + |i - j|} \quad (8)$$

## 7. Energy

The energy property also referred as the angular second-moment property, is a measure of the image homogeneity. It is expressed as the sum of the squares of the matrix elements (Equation (9)),

$$Energy = \sum_i \sum_j r(i,j)^2 \quad (9)$$

## 8. Entropy

The entropy value was calculated by converting the color input image to a gray level image. The entropy of the image is calculated in Equation (10),

$$Entropy = - \sum n \log_2 n \quad (10)$$

where  $n$  is the number of normalized histograms.
